# Supplementary material for: NO x emission estimates during the 2014 Youth Olympic Games in Nanjing
Source: Copernicus journal article supplement (doi:10.5194/acp-15-9399-2015), 2015-08-24
Supplement: Supplementary file 1 [file acp-15-9399-2015-supplement.pdf]

Supplement of Atmos. Chem. Phys., 15, 9399–9412, 2015  
<http://www.atmos-chem-phys.net/15/9399/2015/>  
doi:10.5194/acp-15-9399-2015-supplement  
© Author(s) 2015. CC Attribution 3.0 License.

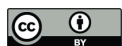

*Supplement of*

## **NO<sub>x</sub> emission estimates during the 2014 Youth Olympic Games in Nanjing**

**J. Ding et al.**

*Correspondence to:* J. Ding (jieying.ding@knmi.nl)

The copyright of individual parts of the supplement might differ from the CC-BY 3.0 licence.

### Calculation of NO<sub>2</sub> concentration from the Air Quality Index

The formula to calculate the NO<sub>2</sub> concentration from the Air Quality Index (AQI) is according to the piecewise linear function:

$$C = \frac{I - I_{low}}{I_{high} - I_{low}} (C_{high} - C_{low}) + C_{low}$$

$C$  is the NO<sub>2</sub> concentration;  $I$  is the AQI;  $C_{low}$  is the concentration breakpoint is lower than  $C$ ;  $C_{high}$  is the concentration breakpoint is higher than  $C$ ;  $I$  is the index breakpoint corresponding to  $C_{low}$ ;  $I_{high}$  is the index breakpoint corresponding to  $C_{high}$ .

The Air Quality Index (AQI) with its corresponding NO<sub>2</sub> concentration breakpoint.

| Air Quality Index (I) | NO <sub>2</sub> hourly mean (ug m <sup>-3</sup> ) (C) |
|-----------------------|-------------------------------------------------------|
| 0                     | 0                                                     |
| 50                    | 100                                                   |
| 100                   | 200                                                   |
| 150                   | 700                                                   |
| 200                   | 1200                                                  |
| 300                   | 2340                                                  |
| 400                   | 3090                                                  |
| 500                   | 3840                                                  |
